# Supplementary material for: Early detection of retinal changes in children with diabetes without retinopathy using optical coherence tomography and optical coherence tomography angiography
Source: Research Square preprint supplement (doi:10.21203/rs.3.rs-7112134/v1), 2025-08-08
Supplement: Supplementary file 1 [file 1fa7c9a25bc8600c24a23a66.docx]

Supplementary Table 1.

|  | | **Time-weight average HbA1C, mg% (mean±SD)** | | | |  |
| --- | --- | --- | --- | --- | --- | --- |
|  | | **<7** | **7-9** | **>9** | **Control** |  |
|  | | **N=18** | **N=84** | **N=47** | **N=150** | **P**  **value** |
| **OCT parameters** | | |  |  |  |  |
|  | Central macular thickness (um) | 260.94 ± 16.26 | 251.87 ± 17.68 | 247.13 ± 20.33 | 252.58 ± 19.72 | 0.07 |
|  | Subfoveal choroidal thickness (um) | 292.89 ± 68.29 | 291.42 ± 64.58 | 280.91 ± 63.24 | 285.66 ± 67.68 | 0.81 |
|  | Parafoveal zone thickness (um) | | | | |  |
| Temporal | 323.94 ± 11.87 | 324.33 ± 14.05 | 320.81 ± 15.45 | 326.51 ± 13.75 | 0.10 |
| Superior | 332.17 ± 28.54 | 336.93 ± 14.23 | 333.68 ± 15.66 | 339.42 ± 13.9 | 0.06 |
| Nasal | 337.44 ± 10.66 | 337.12 ± 14.56 | 332.53 ± 19.14 | 339.76 ± 14.60 | 0.04* |
|  | Inferior | 329.28 ± 16.13 | 334.99 ± 14.33 | 332.96 ± 15.69 | 335.82 ± 15.07 | 0.28 |
|  | Perifoveal zone thickness (um) | | | | |  |
|  | Temporal | 287.83 ± 12.10 | 289.89 ± 12.79 | 289.94 ± 13.34 | 289.41 ± 12.63 | 0.93 |
|  | Superior | 303.00 ± 12.81 | 305.81 ± 14.59 | 304.83 ± 13.44 | 305.87 ± 13.16 | 0.83 |
|  | Nasal | 318.83 ± 14.67 | 320.44 ± 15.62 | 321.85 ± 13.89 | 320.25 ± 15.93 | 0.90 |
|  | Inferior | 294.33 ± 16.57 | 291.90 ± 13.99 | 293.64 ± 14.28 | 290.62 ± 13.72 | 0.49 |
| **OCTA parameters** | | |  |  |  |  |
|  | FAZ area (mm2) | 0.27 ± 0.08 | 0.30 ± 0.10 | 0.34 ± 0.11 | 0.33 ± 0.11 | 0.09 |
|  | FAZ perim (%) | 2.12 ± 0.33 | 2.19 ± 0.39 | 2.30 ± 0.40 | 2.30 ± 0.42 | 0.22 |
|  | Acircularity index (AI) | 1.17 ± 0.06 | 1.14 ± 0.04 | 1.15 ± 0.04 | 1.14 ± 0.04 | 0.08 |
|  | FD-300 (%) | 48.81 ± 2.56 | 48.64 ± 3.64 | 48.46 ± 3.89 | 49.76 ± 3.91 | 0.07 |
|  | Parafoveal superficial vessel density (%) | | | | |  |
|  | Overall | 50.46 ± 2.88 | 49.83 ± 3.56 | 49.41 ± 4.01 | 50.17 ± 3.41 | 0.54 |
|  | Temporal | 50.88 ± 3.90 | 50.20 ± 3.57 | 49.55 ± 3.93 | 50.48 ± 3.44 | 0.39 |
|  | Superior | 50.96 ± 3.77 | 50.16 ± 3.85 | 49.88 ± 4.50 | 50.88 ± 3.77 | 0.32 |
|  | Nasal | 50.11 ± 2.70 | 48.80 ± 6.26 | 48.72 ± 4.34 | 49.28 ± 3.65 | 0.62 |
|  | Inferior | 49.10 ± 3.60 | 48.79 ± 3.92 | 48.59 ± 4.51 | 49.11 ± 4.25 | 0.87 |
|  | Perifoveal superficial vessel density (%) | | | | |  |
|  | Overall | 48.60 ± 1.75 | 48.72 ± 2.49 | 48.55 ± 2.88 | 48.99 ± 2.33 | 0.66 |
|  | Temporal | 45.16 ± 2.47 | 45.35 ± 3.10 | 45.02 ± 3.30 | 45.03 ± 4.33 | 0.93 |
|  | Superior | 48.14 ± 2.36 | 48.51 ± 2.46 | 47.63 ± 3.43 | 48.44 ± 2.76 | 0.29 |
|  | Nasal | 51.82 ± 2.40 | 51.90 ± 2.50 | 51.46 ± 3.02 | 52.26 ± 2.47 | 0.28 |
|  | Inferior | 48.92 ± 1.92 | 48.76 ± 2.96 | 48.71 ± 3.21 | 49.10 ± 2.41 | 0.74 |
|  | Parafoveal deep vessel density (%) | | | | |  |
|  | Overall | 53.68 ± 3.61 | 54.05 ± 3.27 | 54.45 ± 4.13 | 54.01 ± 3.87 | 0.87 |
|  | Temporal | 54.25 ± 3.73 | 54.30 ± 3.50 | 54.80 ± 3.69 | 54.61 ± 3.82 | 0.86 |
|  | Superior | 53.50 ± 4.34 | 53.02 ± 6.12 | 54.22 ± 4.82 | 53.56 ± 4.62 | 0.64 |
|  | Nasal | 54.34 ± 3.26 | 55.10 ± 3.01 | 55.05 ± 4.12 | 54.90 ± 3.63 | 0.87 |
|  | Inferior | 51.54 ± 4.13 | 52.42 ± 3.77 | 52.79 ± 5.03 | 52.06 ± 4.47 | 0.66 |
|  | Perifoveal deep vessel density (%) | | | | |  |
|  | Overall | 48.53 ± 5.55 | 48.61 ± 5.41 | 49.36 ± 6.00 | 48.74 ± 5.27 | 0.88 |
|  | Temporal | 50.87 ± 4.82 | 52.16 ± 4.59 | 52.67 ± 4.90 | 52.18 ± 4.79 | 0.62 |
|  | Superior | 45.71 ± 6.16 | 46.20 ± 6.25 | 47.14 ± 6.58 | 45.92 ± 6.23 | 0.69 |
|  | Nasal | 46.98 ± 6.67 | 47.59 ± 6.04 | 47.86 ± 6.74 | 47.74 ± 5.83 | 0.96 |
|  | Inferior | 46.96 ± 7.15 | 47.87 ± 6.36 | 48.94 ± 7.06 | 48.40 ± 6.30 | 0.67 |
|  |  |  |  |  |  |  |

Comparison of OCT and OCTA parameters among subgroups categorized by **(A)** time-weighted average HbA1c levels and the control group

Supplementary Table 2.

|  | | **Duration of diabetes, years (mean±SD)** | | | |  |
| --- | --- | --- | --- | --- | --- | --- |
|  | | **<3** | **3-5** | **>5** | **Control** |  |
|  | | **N=42** | **N=42** | **N=61** | **N=150** | **P**  **value** |
| **OCT parameters** | | |  |  |  |  |
|  | Central macular thickness (um) | 249.17 ± 18.96 | 253.22 ± 20.82 | 250.49 ± 16.93 | 252.58 ± 19.72 | 0.67 |
|  | Subfoveal choroidal thickness (um) | 285.10 ± 73.73 | 287.56 ± 58.91 | 291.30 ± 62.10 | 285.66 ± 67.68 | 0.95 |
|  | Parafoveal zone thickness (um) | | | | |  |
| Temporal | 322.21 ± 12.43 | 324.78 ± 13.45 | 321.85 ± 16.0 | 326.51 ± 13.75 | 0.10 |
| Superior | 333.40 ± 20.59 | 337.51 ± 14.68 | 334.49 ± 15.96 | 339.42 ± 13.90 | 0.06 |
| Nasal | 335.57 ± 12.90 | 336.88 ± 14.75 | 333.72 ± 18.08 | 339.76 ± 14.60 | 0.05 |
|  | Inferior | 331.55 ± 14.39 | 334.29 ± 14.87 | 333.62 ± 15.47 | 335.82 ± 15.07 | 0.40 |
|  | Perifoveal zone thickness (um) | | | | |  |
|  | Temporal | 287.48 ± 12.01 | 290.68 ± 11.99 | 290.30 ± 14.01 | 289.41 ± 12.63 | 0.65 |
|  | Superior | 301.86 ± 13.18 | 306.27 ± 14.60 | 306.56 ± 14.22 | 305.87 ± 13.16 | 0.31 |
|  | Nasal | 318.71 ± 13.88 | 322.39 ± 15.03 | 320.95 ± 15.83 | 320.25 ± 15.93 | 0.74 |
|  | Inferior | 290.83 ± 14.87 | 293.54 ± 15.07 | 293.08 ± 13.50 | 290.62 ± 13.72 | 0.51 |
| **OCTA parameters** | | |  |  |  |  |
|  | FAZ area (mm2) | 0.30 ± 0.09 | 0.30 ± 0.09 | 0.33 ± 0.13 | 0.33 ± 0.18 | 0.39 |
|  | FAZ perim (%) | 2.21 ± 0.31 | 2.17 ± 0.32 | 2.26 ± 0.47 | 2.26 ± 0.42 | 0.58 |
|  | Acircularity index (AI) | 1.15 ± 0.04 | 1.14 ± 0.03 | 1.15 ± 0.05 | 1.14 ± 0.04 | 0.22 |
|  | FD-300 (%) | 49.57 ± 3.2 | 48.86 ± 3.48 | 47.62 ± 3.76 | 49.76 ± 3.91 | <0.01* |
|  | Parafoveal superficial vessel density (%) | | | | |  |
|  | Overall | 50.07 ± 3.40 | 50.65 ± 3.27 | 48.75 ± 3.88 | 50.17 ± 3.41 | 0.02* |
|  | Temporal | 50.26 ± 3.39 | 50.79 ± 3.82 | 49.21 ± 3.84 | 50.48 ± 3.44 | 0.08 |
|  | Superior | 50.73 ± 3.69 | 51.29 ± 3.89 | 48.77 ± 4.12 | 50.88 ± 3.77 | <0.01* |
|  | Nasal | 49.59 ± 3.48 | 49.2 ± 7.820 | 48.07 ± 4.38 | 49.28 ± 3.65 | 0.29 |
|  | Inferior | 48.77 ± 3.93 | 49.29 ± 3.61 | 48.13 ± 4.43 | 49.11 ± 4.25 | 0.41 |
|  | Perifoveal superficial vessel density (%) | | | | |  |
|  | Overall | 48.58 ± 2.26 | 49.21 ± 2.34 | 48.23 ± 2.83 | 48.99 ± 2.33 | 0.12 |
|  | Temporal | 44.76 ± 2.83 | 45.75 ± 2.72 | 45.09 ± 3.42 | 45.03 ± 4.33 | 0.66 |
|  | Superior | 47.95 ± 3.1 | 48.82 ± 2.34 | 47.83 ± 2.89 | 48.44 ± 2.76 | 0.24 |
|  | Nasal | 51.76 ± 2.59 | 52.21 ± 2.54 | 51.34 ± 2.83 | 52.26 ± 2.47 | 0.11 |
|  | Inferior | 48.67 ± 2.81 | 49.37 ± 2.68 | 48.27 ± 3.16 | 49.10 ± 2.41 | 0.13 |
|  | Parafoveal deep vessel density (%) | | | | |  |
|  | Overall | 54.09 ± 2.78 | 54.86 ± 3.82 | 53.52 ± 3.80 | 54.01 ± 3.87 | 0.36 |
|  | Temporal | 54.22 ± 2.86 | 54.94 ± 4.00 | 54.13 ± 3.66 | 54.61 ± 3.82 | 0.67 |
|  | Superior | 54.06 ± 3.10 | 54.45 ± 4.37 | 52.11 ± 7.14 | 53.56 ± 4.62 | 0.09 |
|  | Nasal | 55.01 ± 2.58 | 55.64 ± 3.57 | 54.48 ± 3.76 | 54.90 ± 3.63 | 0.45 |
|  | Inferior | 52.06 ± 3.54 | 53.49 ± 4.13 | 51.78 ± 4.57 | 52.06 ± 4.47 | 0.22 |
|  | Perifoveal deep vessel density (%) | | | | |  |
|  | Overall | 47.77 ± 4.36 | 50.09 ± 5.85 | 48.39 ± 5.96 | 48.74 ± 5.27 | 0.25 |
|  | Temporal | 51.21 ± 3.75 | 53.07 ± 4.89 | 52.05 ± 4.95 | 52.18 ± 4.79 | 0.35 |
|  | Superior | 45.71 ± 4.80 | 47.12 ± 6.55 | 46.14 ± 7.06 | 45.92 ± 6.23 | 0.71 |
|  | Nasal | 46.54 ± 5.53 | 49.21 ± 6.22 | 46.88 ± 6.61 | 47.74 ± 5.83 | 0.16 |
|  | Inferior | 46.78 ± 5.13 | 49.20 ± 7.38 | 47.77 ± 6.90 | 48.40 ± 6.30 | 0.33 |
|  |  |  |  |  |  |  |

Supplemental Table B. Comparison of OCT and OCTA parameters among subgroups categorized by **(A)** time-weighted average HbA1c levels and the control group
