# Supplementary material for: Early detection of retinal changes in children with diabetes without retinopathy using optical coherence tomography and optical coherence tomography angiography
Source: Research Square preprint supplement (doi:10.21203/rs.3.rs-7112134/v1), 2025-08-08
Supplement: Supplementary file 3 [file 841d08c836d1dd504ce526be.docx]

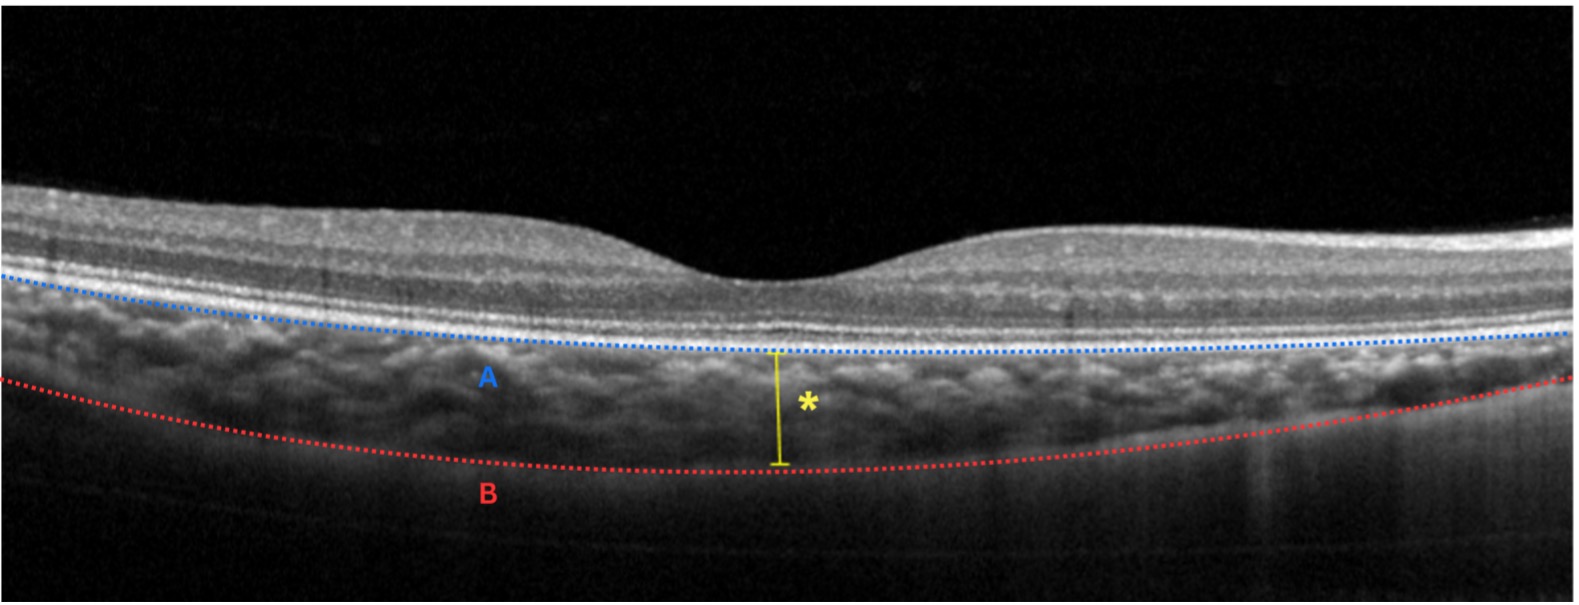


Supplemental Figure 2. Subfoveal choroidal thickness (SFCT) measurement. The vertical distance from the outer border of the retinal pigment epithelium (RPE) (A) to the choroidoscleral interface (B) was manually measured using the built-in caliper tool of the imaging software.
